# Supplementary material
Source: MDPI journal article supplement (https://www.mdpi.com/search?q=nanomaterials-09-01054)
Supplement: s001 [file nanomaterials-09-01054-s001.pdf]

Submitted to ***Nanomaterials***

Electronic Supplementary Information for

**The Novel Z-Scheme Ternary-Component Ag/AgI/ $\alpha$ -MoO<sub>3</sub>  
Catalyst with Excellent Visible-Light Photocatalytic  
Oxidation Desulfurization Performance for Model Fuel**

Yanzhong Zhen<sup>\*1</sup>, Jie Wang<sup>1</sup>, Feng Fu<sup>\*1</sup>, Wenhao Fu<sup>1</sup> and Yucang Liang<sup>\*2</sup>,

<sup>1</sup> Shaanxi Key Laboratory of Chemical Reaction Engineering, School of Chemistry & Chemical Engineering, Yan'an University, Yan'an 716000, Shaanxi, China

<sup>2</sup> Institut für Anorganische Chemie, Eberhard Karls Universität Tübingen, Auf der Morgenstelle 18, 72076 Tübingen, Germany

\* To whom correspondence should be addressed.

E-mail: zyz943@163.com (Associate Prof. Dr. Y. Z.)

yadxfufeng@126.com (Prof. Dr. F. F.)

yucang.liang@uni-tuebingen.de (Dr. Y. L.)

## **Captions and Figures:**

**Fig. S1.** XPS survey spectrum of Ag/AgI/ $\alpha$ -MoO<sub>3</sub> (AAM-35).

**Fig. S2.** Comparison of XRD patterns of white precipitates in Ba(NO<sub>3</sub>)<sub>2</sub> solution and AAM-35.

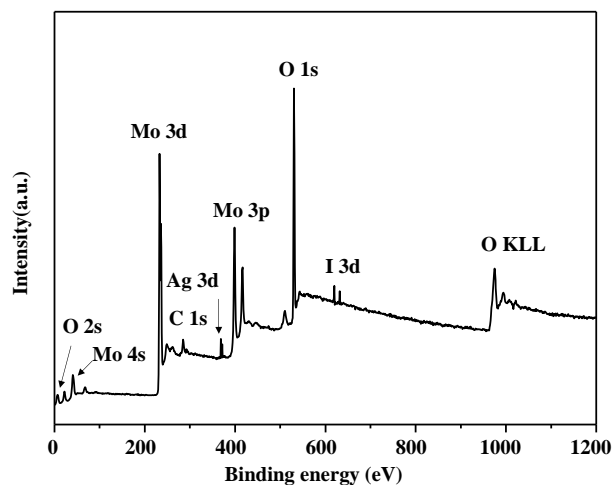

**Fig. S1.** XPS survey spectrum of Ag/AgI/ $\alpha$ -MoO<sub>3</sub> (AAM-35)

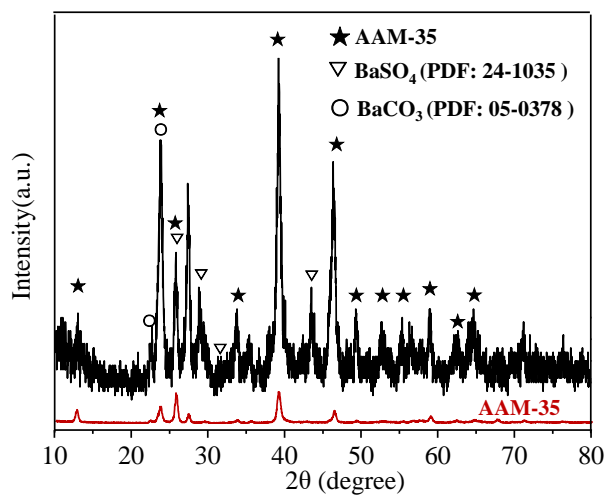

**Fig. S2.** Comparison of XRD pattern of white precipitates in Ba(NO<sub>3</sub>)<sub>2</sub> solution and pure AAM-35.
